# Supplementary material for: Enhancing the energy harvesting performance of PDMS based piezocomposites via a synergistic effect
Source: Royal Society of Chemistry journal article supplement (doi:10.1039/d1tc03722f), 2021-01-01
Supplement: d1tc03722f1.pdf [file d1tc03722f1.pdf]

# **Enhancing Energy Harvesting Performance of PDMS based Piezocomposites via Synergy effect**

Yijin Hao, Yudong Hou,\* Hui Xu, Xin Gao, Mankang Zhu, Mupeng Zheng

Key Laboratory of Advanced Functional Materials, Ministry of Education, Faculty of Materials  
and Manufacturing, Beijing University of Technology, Beijing 100124, China

The finite element analysis was conducted to provide theoretical evidence on the mechanism of the enhanced piezoelectric effect in the 2-2 type PZN-PZT/MW-CNTs/PDMS with interconnected skeleton structure. For comparison, the analysis of 0-3 type PZN-PZT/PDMS with randomly-distributed particle was also performed.

Under the same external force conditions, the ice-templated 2-2 type composite shows higher applied net stress on the PZN-PZT element than the case of the 0-3 type counterpart. This larger induced stress would generate a stronger piezoelectric polarization, and as a result, stronger piezoelectric voltage response. The total piezoelectric field response in the 2-2 type composite is clearly higher than that of the 0-3 type composite, which agrees qualitatively with our experimental energy harvesting signals.

Ceramic material is set as PZT-5H in the material library in Comsol Multiphysics. The radius of ceramic particle is set to 2  $\mu\text{m}$ .

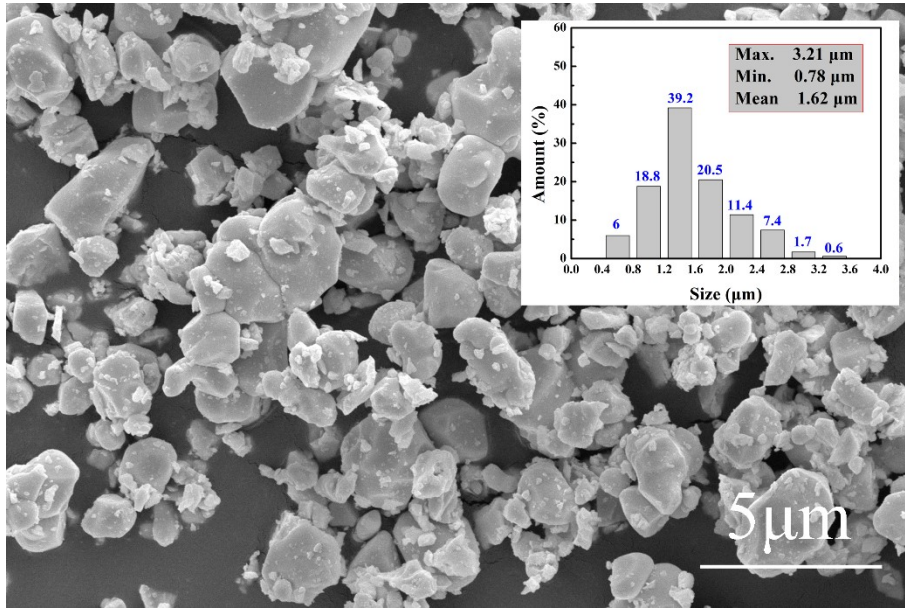

Figure S1. SEM image of PZN-PZT ceramic particles, the inset shows statistical results of particle size

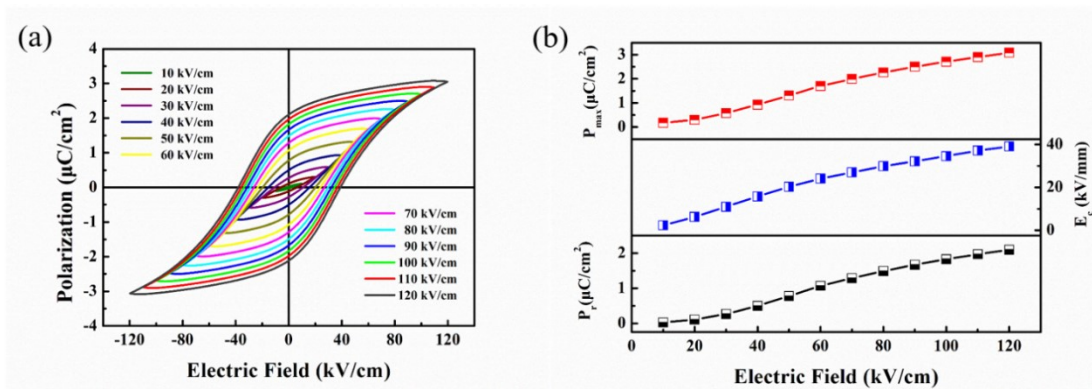

Figure S2. Hysteresis loops of PZN-PZT/PDMS composite with sintering under different electric field conditions, (b)  $P_{\text{max}}$ ,  $E_c$  and  $P_r$  of composite under different electric field conditions

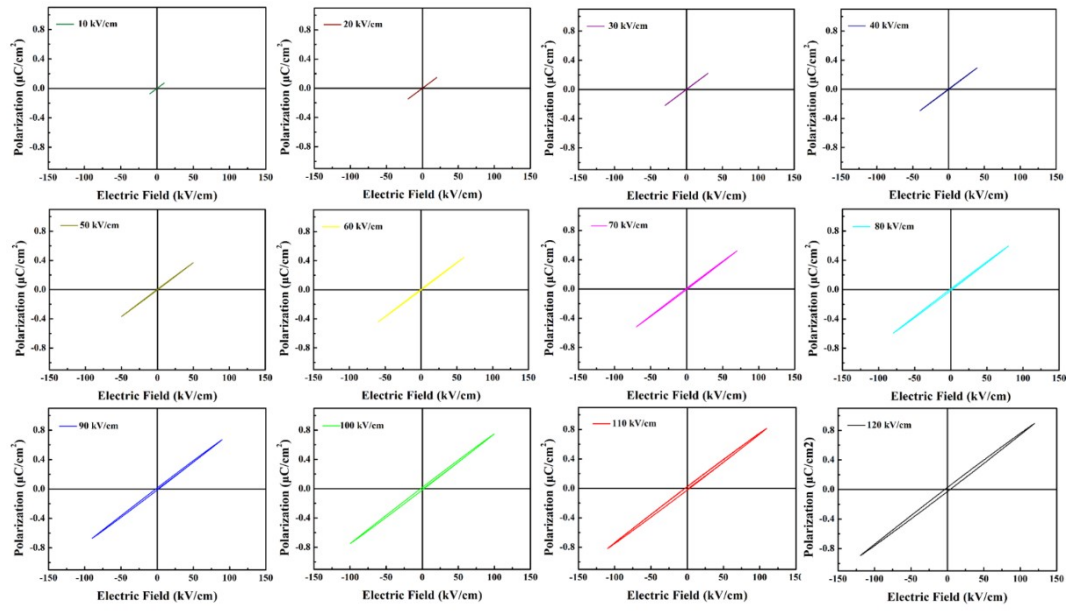

Figure S3. Hysteresis loops of PZN-PZT/PDMS composite without sintering under different electric field conditions
